# Supplementary material
Source: MDPI journal article supplement (https://www.mdpi.com/2673-7256/4/1/1)
Supplement: s1 [file s1]

Supplementary Materials for

# **Twisted 8-Acyl-1-dialkyl-amino-naphthalenes Emit from a Planar Intramolecular Charge Transfer Excited State.**

**Christopher Abelt <sup>1,\*</sup> and Kirsten Sweigart <sup>2</sup>**

<sup>1</sup> Department of Chemistry, College of William and Mary, Williamsburg, VA 23185, USA

<sup>2</sup> Independent Researcher; Northbrook, IL 60062, USA, kmsweigart@outlook.com

\* Correspondence: cjabel@wm.edu

## Table of Contents

|                                                      |    |
|------------------------------------------------------|----|
| Title page .....                                     | S1 |
| Table of contents .....                              | S2 |
| General information .....                            | S3 |
| Frontier molecular orbitals .....                    | S4 |
| Figure S1 .....                                      | S4 |
| Cartesian coordinates for optimized structures ..... | S5 |
| Table S1 .....                                       | S5 |
| Table S2 .....                                       | S6 |
| Table S4 .....                                       | S7 |
| Table S4 .....                                       | S8 |

## General Information

Electronic structure calculations were carried out using Gaussian 16 [31]. Ground state geometries were optimized using the DFT B3YLP method with the 6-311G + (2d,p) basis set. Excited states were optimized using the TD-SCF DFT B3LYP method with the 6-311G + (2d,p) basis set. Solvent effects were modeled with the IEFPCM method.

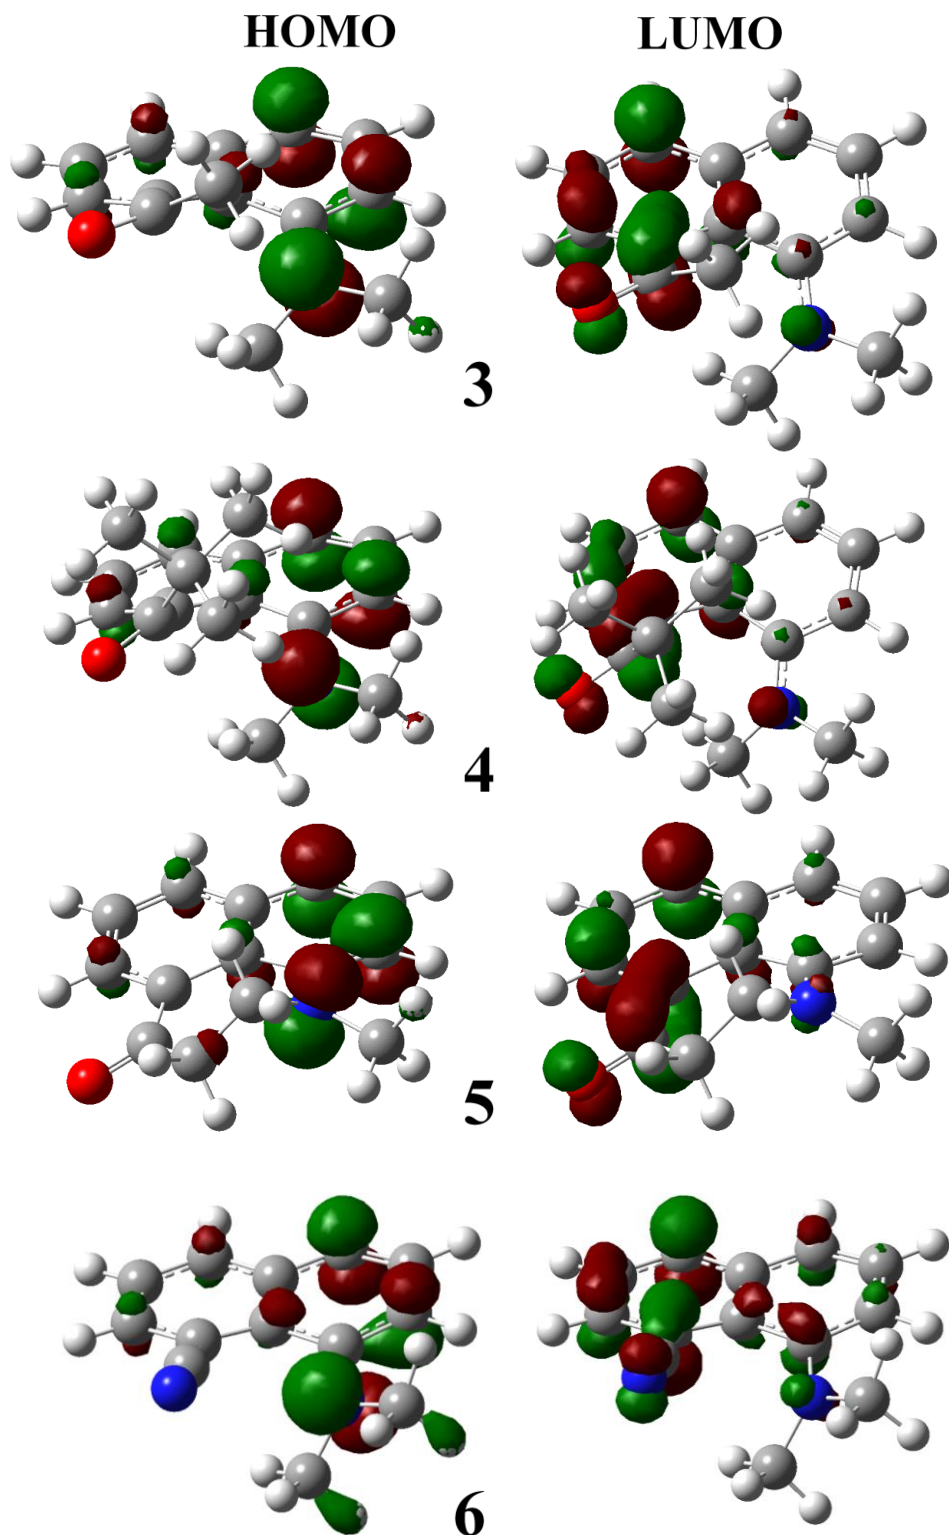

**Figure S1.** Frontier molecular orbitals for the relaxed first singlet excited states of **3** (top), **4** (top middle), **5** (bottom middle), and **6** (bottom) using a solvent model for acetonitrile: HOMO (left column), LUMO (right column).

**Table S1.** Cartesian coordinates for the optimized structures of **3** in the ground state ( $S_0$ , no solvent model), and relaxed excited states ( $S_1$ , with MeCN and toluene)

|        | $S_0$    | gas phase |          |  | $S_1$    | MeCN     |          |  | $S_1$    | Toluene  |          |  |
|--------|----------|-----------|----------|--|----------|----------|----------|--|----------|----------|----------|--|
| Symbol | X        | Y         | Z        |  | X        | Y        | Z        |  | X        | Y        | Z        |  |
| C      | -2.02979 | 0.332672  | 0.009503 |  | 1.672195 | 1.081103 | -0.03251 |  | -1.76822 | 0.924006 | 0.033231 |  |
| C      | -0.62544 | 0.065708  | -0.00262 |  | 0.501576 | 0.271512 | -0.02598 |  | -0.53017 | 0.226754 | 0.033597 |  |
| C      | -2.48211 | 1.667579  | 0.157683 |  | 1.554528 | 2.465863 | -0.33159 |  | -1.77454 | 2.316141 | 0.3273   |  |
| C      | 0.283585 | 1.170808  | -0.00202 |  | -0.76578 | 0.969748 | 0.014826 |  | 0.668236 | 1.038491 | -0.01675 |  |
| C      | -2.94047 | -0.7457   | -0.11322 |  | 2.944088 | 0.511096 | 0.227867 |  | -2.98137 | 0.236643 | -0.22211 |  |
| C      | -1.58516 | 2.695729  | 0.269585 |  | 0.325575 | 3.064572 | -0.55001 |  | -0.60648 | 3.02874  | 0.535156 |  |
| H      | -3.54864 | 1.85867   | 0.187549 |  | 2.461097 | 3.05467  | -0.40866 |  | -2.73165 | 2.8177   | 0.412625 |  |
| C      | -1.10816 | -2.30559  | -0.17228 |  | 1.913943 | -1.66404 | 0.4242   |  | -1.74717 | -1.83165 | -0.42006 |  |
| C      | -0.20039 | 2.450106  | 0.167479 |  | -0.83594 | 2.335592 | -0.35999 |  | 0.617631 | 2.408701 | 0.344056 |  |
| N      | 1.664743 | 0.886408  | -0.2063  |  | -1.89811 | 0.401553 | 0.529524 |  | 1.845637 | 0.567213 | -0.53143 |  |
| C      | -2.4894  | -2.03355  | -0.23124 |  | 3.022677 | -0.84431 | 0.542532 |  | -2.92816 | -1.11999 | -0.53789 |  |
| H      | -1.93467 | 3.713344  | 0.398375 |  | 0.265212 | 4.11675  | -0.79594 |  | -0.64394 | 4.083458 | 0.775896 |  |
| H      | -0.76114 | -3.33144  | -0.21044 |  | 2.002102 | -2.73069 | 0.582556 |  | -1.72776 | -2.90132 | -0.58236 |  |
| C      | 2.613405 | 1.766235  | 0.462903 |  | -3.2291  | 0.934751 | 0.248719 |  | 3.123355 | 1.215664 | -0.25905 |  |
| C      | 2.019889 | 0.680544  | -1.61563 |  | -1.87371 | -0.57714 | 1.613542 |  | 1.906762 | -0.42783 | -1.60013 |  |
| H      | -3.19088 | -2.85197  | -0.34071 |  | 3.973658 | -1.27475 | 0.836872 |  | -3.83312 | -1.63927 | -0.83362 |  |
| H      | 3.012288 | 0.230725  | -1.6738  |  | -2.30747 | -1.52457 | 1.290427 |  | 2.414709 | -1.332   | -1.26235 |  |
| H      | 2.022309 | 1.62887   | -2.17362 |  | -2.48474 | -0.18133 | 2.428581 |  | 2.481742 | 0.006381 | -2.42309 |  |
| H      | 0.484312 | 3.288168  | 0.186099 |  | -1.78807 | 2.843122 | -0.37781 |  | 1.519215 | 3.002335 | 0.348521 |  |
| H      | 1.316702 | -0.00241  | -2.08706 |  | -0.86191 | -0.73943 | 1.964162 |  | 0.91263  | -0.6835  | -1.94531 |  |
| C      | -0.18734 | -1.29098  | -0.02821 |  | 0.655212 | -1.17016 | -0.03254 |  | -0.54488 | -1.22168 | 0.04254  |  |
| C      | 1.766845 | -1.56181  | 1.627421 |  | -1.36243 | -1.72483 | -1.55522 |  | 1.502539 | -1.58728 | 1.584859 |  |
| H      | 3.604676 | 1.310286  | 0.419031 |  | -3.94165 | 0.114646 | 0.327872 |  | 3.904921 | 0.458963 | -0.32241 |  |
| H      | 2.686789 | 2.762853  | 0.000714 |  | -3.50894 | 1.700966 | 0.977143 |  | 3.342331 | 1.992986 | -0.99832 |  |
| H      | 2.855623 | -1.52775  | 1.618302 |  | -2.36994 | -1.81129 | -1.13411 |  | 2.523267 | -1.57858 | 1.186464 |  |
| H      | 1.455926 | -2.44879  | 2.19096  |  | -1.31142 | -2.43386 | -2.38544 |  | 1.49983  | -2.30559 | 2.408031 |  |
| H      | -4.00329 | -0.53156  | -0.11629 |  | 3.82225  | 1.143422 | 0.221854 |  | -3.9161  | 0.781678 | -0.21511 |  |
| C      | 1.244931 | -1.71361  | 0.212242 |  | -0.29514 | -2.1268  | -0.55275 |  | 0.499765 | -2.08588 | 0.554207 |  |
| O      | 1.871376 | -2.32186  | -0.6308  |  | -0.18908 | -3.35923 | -0.28855 |  | 0.53771  | -3.30507 | 0.256068 |  |
| H      | 1.358595 | -0.68764  | 2.132132 |  | -1.23984 | -0.71956 | -1.95621 |  | 1.273762 | -0.6014  | 1.989455 |  |
| H      | 2.334845 | 1.889844  | 1.509725 |  | -3.27714 | 1.343173 | -0.75616 |  | 3.135234 | 1.643209 | 0.739401 |  |

**Table S2.** Cartesian coordinates for the optimized structures of **4** in the ground state ( $S_0$ , no solvent model), and relaxed excited states ( $S_1$ , with MeCN and toluene)

|        | $S_0$ gas phase |          |          |  | $S_1$ MeCN |          |          |  | $S_1$ Toluene |          |          |
|--------|-----------------|----------|----------|--|------------|----------|----------|--|---------------|----------|----------|
| Symbol | X               | Y        | Z        |  | X          | Y        | Z        |  | X             | Y        | Z        |
| C      | -2.23989        | -0.88756 | 0.261143 |  | -2.2418    | -0.88814 | 0.263394 |  | 2.300969      | -0.97341 | -0.12825 |
| C      | -0.99807        | -0.28013 | -0.08765 |  | -1.00134   | -0.28067 | -0.07999 |  | 1.081159      | -0.267   | 0.125211 |
| C      | -3.22919        | -0.10661 | 0.920899 |  | -3.23104   | -0.10428 | 0.922531 |  | 3.435079      | -0.26943 | -0.60526 |
| C      | -0.97339        | 1.16786  | -0.10635 |  | -0.97842   | 1.167404 | -0.10382 |  | 1.089548      | 1.16222  | 0.009934 |
| C      | -2.47679        | -2.25118 | -0.0242  |  | -2.47474   | -2.25214 | -0.02185 |  | 2.35778       | -2.37198 | 0.08512  |
| C      | -3.05925        | 1.249594 | 1.140605 |  | -3.06606   | 1.253065 | 1.136451 |  | 3.377786      | 1.081651 | -0.80683 |
| H      | -4.128          | -0.60115 | 1.270184 |  | -4.12608   | -0.60065 | 1.279506 |  | 4.343284      | -0.82318 | -0.81338 |
| C      | -0.25238        | -2.42397 | -0.95015 |  | -0.25224   | -2.41303 | -0.9589  |  | 0.036665      | -2.3799  | 0.70404  |
| C      | -1.95748        | 1.899199 | 0.610822 |  | -1.96421   | 1.903525 | 0.605285 |  | 2.210395      | 1.799475 | -0.47764 |
| N      | -0.1123         | 1.875936 | -0.89409 |  | -0.11334   | 1.869454 | -0.89437 |  | -0.06863      | 1.878576 | 0.43351  |
| C      | -1.50364        | -2.96864 | -0.723   |  | -1.50155   | -2.961   | -0.72991 |  | 1.256839      | -3.05767 | 0.521423 |
| H      | -3.82047        | 1.819353 | 1.657622 |  | -3.82932   | 1.82209  | 1.651865 |  | 4.240634      | 1.616526 | -1.18587 |
| H      | 0.521851        | -3.01788 | -1.41796 |  | 0.521931   | -2.99558 | -1.44123 |  | -0.83861      | -2.94044 | 1.008923 |
| C      | 0.11076         | 3.308563 | -0.70152 |  | 0.120732   | 3.29747  | -0.70134 |  | -0.30949      | 3.153817 | -0.23276 |
| C      | 0.386801        | 1.379605 | -2.17668 |  | 0.389393   | 1.365517 | -2.1738  |  | -0.14319      | 2.03655  | 1.89383  |
| H      | -1.70812        | -3.98351 | -1.04569 |  | -1.70532   | -3.97315 | -1.06109 |  | 1.308775      | -4.12441 | 0.70368  |
| H      | 1.471802        | 1.276419 | -2.15877 |  | 1.473702   | 1.258921 | -2.15357 |  | -1.14225      | 2.378451 | 2.167666 |
| H      | 0.118682        | 2.114478 | -2.93961 |  | 0.119742   | 2.094947 | -2.94282 |  | 0.597469      | 2.766904 | 2.252171 |
| H      | -1.91387        | 2.976399 | 0.646401 |  | -1.92371   | 2.981507 | 0.631517 |  | 2.21547       | 2.876315 | -0.58062 |
| H      | -0.06017        | 0.423397 | -2.41959 |  | -0.05309   | 0.405787 | -2.41045 |  | 0.028786      | 1.085256 | 2.389891 |
| C      | 0.110522        | -1.13196 | -0.4638  |  | 0.109365   | -1.12735 | -0.45952 |  | -0.0765       | -1.02312 | 0.4821   |
| C      | 2.222646        | -0.17417 | 0.847848 |  | 2.224576   | -0.17894 | 0.855828 |  | -2.35551      | -0.34548 | -0.67849 |
| H      | 1.086952        | 3.554763 | -1.11644 |  | 1.104142   | 3.535299 | -1.10512 |  | -1.31061      | 3.501148 | 0.028653 |
| H      | -0.64238        | 3.900574 | -1.22918 |  | -0.62103   | 3.900614 | -1.23487 |  | 0.39935       | 3.941298 | 0.065962 |
| H      | -3.423          | -2.69871 | 0.251014 |  | -3.41796   | -2.70476 | 0.254791 |  | 3.293341      | -2.88796 | -0.0987  |
| C      | 1.534959        | -0.83506 | -0.38574 |  | 1.534493   | -0.82103 | -0.38804 |  | -1.48508      | -0.4687  | 0.59978  |
| O      | 2.310323        | -1.32987 | -1.25167 |  | 2.302706   | -1.28121 | -1.26877 |  | -1.99265      | -0.34457 | 1.695062 |
| H      | 0.107526        | 3.564437 | 0.354039 |  | 0.110395   | 3.55401  | 0.35447  |  | -0.25607      | 3.031806 | -1.3147  |
| C      | 3.141354        | -1.27685 | 1.434618 |  | 3.127618   | -1.30034 | 1.429851 |  | -3.11913      | -1.68938 | -0.78571 |
| H      | 3.699545        | -0.88144 | 2.287655 |  | 3.702615   | -0.9206  | 2.279392 |  | -3.7946       | -1.65491 | -1.64434 |
| H      | 2.553301        | -2.13071 | 1.782612 |  | 2.526453   | -2.14448 | 1.778218 |  | -2.43833      | -2.53055 | -0.93402 |
| H      | 3.848734        | -1.6313  | 0.686191 |  | 3.81718    | -1.66423 | 0.669491 |  | -3.7117       | -1.87365 | 0.111844 |
| C      | 3.113039        | 1.00229  | 0.402274 |  | 3.131443   | 0.9866   | 0.416736 |  | -3.37263      | 0.789741 | -0.49111 |
| H      | 3.728794        | 1.350458 | 1.236709 |  | 3.755222   | 1.322033 | 1.25069  |  | -4.07138      | 0.805287 | -1.33149 |
| H      | 3.776678        | 0.695636 | -0.40739 |  | 3.785769   | 0.671501 | -0.39697 |  | -3.93882      | 0.656511 | 0.430226 |
| H      | 2.519969        | 1.851538 | 0.057987 |  | 2.549049   | 1.846943 | 0.078435 |  | -2.87303      | 1.758332 | -0.44714 |
| C      | 1.294859        | 0.282893 | 1.984526 |  | 1.299414   | 0.28191  | 1.992275 |  | -1.5469       | -0.13344 | -1.96528 |
| H      | 0.706675        | 1.163061 | 1.729995 |  | 0.721705   | 1.170781 | 1.740209 |  | -0.99228      | 0.804237 | -1.94433 |
| H      | 0.60825         | -0.50942 | 2.289388 |  | 0.601656   | -0.50328 | 2.289532 |  | -0.83705      | -0.94374 | -2.14009 |
| H      | 1.901589        | 0.54782  | 2.854962 |  | 1.904871   | 0.534409 | 2.867626 |  | -2.22764      | -0.10041 | -2.82005 |

**Table S3.** Cartesian coordinates for the optimized structures of **5** in the ground state ( $S_0$ , no solvent model), and relaxed excited states ( $S_1$ , with MeCN and toluene)

|        | $S_0$    | gas phase |          |  | $S_1$    | MeCN     |          |  | $S_1$    | Toluene  |          |  |
|--------|----------|-----------|----------|--|----------|----------|----------|--|----------|----------|----------|--|
| Symbol | X        | Y         | Z        |  | X        | Y        | Z        |  | X        | Y        | Z        |  |
| C      | 1.905706 | -0.57289  | 0.101458 |  | 1.914873 | -0.54035 | 0.104495 |  | -1.99012 | 0.328932 | 0.087263 |  |
| C      | 0.546819 | -0.13002  | 0.060812 |  | 0.551527 | -0.12053 | 0.060719 |  | -0.57863 | 0.076465 | 0.017789 |  |
| C      | 2.22165  | -1.95275  | -0.00945 |  | 2.252394 | -1.9163  | -0.00287 |  | -2.49341 | 1.650043 | -0.01    |  |
| C      | -0.44839 | -1.18967  | -0.03116 |  | -0.42477 | -1.20006 | -0.02891 |  | 0.297468 | 1.218281 | -0.07594 |  |
| C      | 2.99304  | 0.340675  | 0.181949 |  | 2.988708 | 0.391015 | 0.179583 |  | -2.89556 | -0.75161 | 0.209171 |  |
| C      | 1.255618 | -2.91966  | -0.209   |  | 1.306026 | -2.90251 | -0.19718 |  | -1.63611 | 2.699729 | -0.18265 |  |
| H      | 3.266217 | -2.23763  | 0.031351 |  | 3.302381 | -2.18152 | 0.035241 |  | -3.56478 | 1.805047 | 0.03282  |  |
| C      | 1.440015 | 2.161889  | 0.015226 |  | 1.403571 | 2.184026 | -0.00038 |  | -1.09174 | -2.31015 | 0.023995 |  |
| C      | -0.07014 | -2.54122  | -0.23542 |  | -0.02674 | -2.54631 | -0.22495 |  | -0.24736 | 2.485163 | -0.20298 |  |
| N      | -1.77858 | -0.96005  | 0.142968 |  | -1.76146 | -0.99172 | 0.140422 |  | 1.683176 | 1.025783 | -0.04079 |  |
| C      | 2.735069 | 1.701355  | 0.138965 |  | 2.70587  | 1.745426 | 0.122368 |  | -2.4582  | -2.04866 | 0.192941 |  |
| H      | 1.526898 | -3.96198  | -0.31261 |  | 1.597046 | -3.94006 | -0.29709 |  | -2.01577 | 3.710196 | -0.27779 |  |
| H      | 1.248287 | 3.222687  | -0.05337 |  | 1.190256 | 3.239458 | -0.08648 |  | -0.74475 | -3.33106 | -0.06579 |  |
| C      | -2.25448 | 0.167879  | 0.934812 |  | -2.26215 | 0.130164 | 0.927965 |  | 2.178113 | 0.160747 | 1.039815 |  |
| C      | -2.81064 | -1.8799   | -0.32905 |  | -2.77353 | -1.92352 | -0.34387 |  | 2.554365 | 2.132542 | -0.39489 |  |
| H      | 3.552943 | 2.412356  | 0.185918 |  | 3.511274 | 2.471156 | 0.155238 |  | -3.15895 | -2.87024 | 0.278738 |  |
| H      | -3.70009 | -1.29511  | -0.55822 |  | -3.6716  | -1.35293 | -0.57722 |  | 3.570485 | 1.754707 | -0.51259 |  |
| H      | -3.06845 | -2.60809  | 0.4447   |  | -3.02845 | -2.66493 | 0.419958 |  | 2.573189 | 2.935238 | 0.35836  |  |
| H      | -0.83419 | -3.29868  | -0.31195 |  | -0.7791  | -3.31653 | -0.29497 |  | 0.404688 | 3.342762 | -0.28588 |  |
| H      | -2.49109 | -2.39379  | -1.23008 |  | -2.43957 | -2.42653 | -1.2466  |  | 2.246907 | 2.560833 | -1.34913 |  |
| C      | 0.294766 | 1.306502  | -0.02216 |  | 0.272734 | 1.310704 | -0.02317 |  | -0.15431 | -1.29441 | -0.0488  |  |
| C      | -2.31263 | 1.433215  | 0.103177 |  | -2.34129 | 1.392939 | 0.095052 |  | 2.417697 | -1.2448  | 0.525218 |  |
| H      | -3.23994 | -0.09848  | 1.313444 |  | -3.24296 | -0.15789 | 1.30619  |  | 3.104508 | 0.582457 | 1.434623 |  |
| H      | -1.58793 | 0.300322  | 1.787929 |  | -1.59958 | 0.277397 | 1.781871 |  | 1.460585 | 0.154901 | 1.865771 |  |
| H      | -2.90089 | 1.266998  | -0.80723 |  | -2.91136 | 1.212948 | -0.82444 |  | 3.296681 | -1.28705 | -0.12131 |  |
| H      | -2.84842 | 2.197336  | 0.674908 |  | -2.89946 | 2.148179 | 0.655534 |  | 2.598048 | -1.94119 | 1.353743 |  |
| H      | 4.002281 | -0.04624  | 0.227776 |  | 4.00435  | 0.021564 | 0.224672 |  | -3.95303 | -0.52793 | 0.294834 |  |
| C      | -0.95787 | 2.008613  | -0.24027 |  | -0.99209 | 2.000604 | -0.23078 |  | 1.250685 | -1.79896 | -0.27136 |  |
| O      | -0.96335 | 3.207056  | -0.64408 |  | -1.01922 | 3.197492 | -0.60793 |  | 1.435327 | -2.73613 | -1.0223  |  |

**Table S4.** Cartesian coordinates for the optimized structures of **6** in the ground state ( $S_0$ , no solvent model), and relaxed excited states ( $S_1$ , with MeCN and toluene)

|        | $S_0$    | gas phase |          |  | $S_1$    | MeCN     |          |  | $S_1$    | Toluene  |          |  |
|--------|----------|-----------|----------|--|----------|----------|----------|--|----------|----------|----------|--|
| Symbol | X        | Y         | Z        |  | X        | Y        | Z        |  | X        | Y        | Z        |  |
| C      | 1.682134 | 0.822991  | 0.040026 |  | 1.626183 | 0.884635 | 0.036619 |  | 1.771264 | 0.651562 | 0.000293 |  |
| C      | 0.462826 | 0.073864  | -0.01504 |  | 0.453029 | 0.082422 | -0.01473 |  | 0.47242  | 0.019825 | 0.000776 |  |
| C      | 1.645411 | 2.238302  | -0.01616 |  | 1.500512 | 2.295806 | -0.07962 |  | 1.851707 | 2.066447 | -0.0014  |  |
| C      | -0.7802  | 0.792481  | -0.0325  |  | -0.80889 | 0.758929 | -0.04202 |  | -0.63563 | 0.889444 | 0.001051 |  |
| C      | 2.923119 | 0.145941  | 0.1149   |  | 2.913132 | 0.295096 | 0.152823 |  | 2.937627 | -0.14804 | 0.001342 |  |
| C      | 0.450255 | 2.893131  | -0.12973 |  | 0.276441 | 2.916695 | -0.25846 |  | 0.723776 | 2.868404 | -0.00297 |  |
| H      | 2.579584 | 2.786312  | 0.014963 |  | 2.405418 | 2.892265 | -0.06018 |  | 2.836084 | 2.520003 | -0.00175 |  |
| C      | 1.811235 | -1.97101  | -0.03713 |  | 1.930203 | -1.91212 | 0.085102 |  | 1.63997  | -2.17997 | 0.000334 |  |
| C      | -0.75732 | 2.170612  | -0.12494 |  | -0.88083 | 2.156111 | -0.25183 |  | -0.537   | 2.287465 | -0.00177 |  |
| N      | -1.98969 | 0.067155  | 0.02178  |  | -1.99971 | 0.105401 | 0.222947 |  | -1.98155 | 0.364555 | 0.000148 |  |
| C      | 2.989379 | -1.22238  | 0.094755 |  | 3.03261  | -1.10078 | 0.220171 |  | 2.859365 | -1.54562 | 0.001143 |  |
| H      | 0.42188  | 3.974483  | -0.19292 |  | 0.216478 | 3.991823 | -0.36672 |  | 0.816729 | 3.947424 | -0.00442 |  |
| H      | 1.859893 | -3.04965  | -0.11116 |  | 2.039883 | -2.98931 | 0.097691 |  | 1.577958 | -3.26031 | -0.00043 |  |
| C      | -3.1401  | 0.63145   | -0.66495 |  | -3.25757 | 0.535245 | -0.36908 |  | -2.68298 | 0.219093 | -1.25035 |  |
| C      | -2.34502 | -0.46285  | 1.33909  |  | -2.13991 | -0.77443 | 1.376713 |  | -2.68429 | 0.229533 | 1.250969 |  |
| H      | 3.94382  | -1.73057  | 0.151578 |  | 4.008743 | -1.55144 | 0.359004 |  | 3.768521 | -2.13537 | 0.001331 |  |
| H      | -3.05599 | -1.28223  | 1.221783 |  | -2.69419 | -1.6697  | 1.099262 |  | -3.5776  | -0.375   | 1.126071 |  |
| H      | -2.79461 | 0.314197  | 1.976955 |  | -2.70083 | -0.23599 | 2.148766 |  | -2.95462 | 1.233344 | 1.600309 |  |
| H      | -1.692   | 2.71432   | -0.163   |  | -1.84492 | 2.640955 | -0.29828 |  | -1.43234 | 2.895819 | -0.00368 |  |
| H      | -1.46446 | -0.85049  | 1.847731 |  | -1.16799 | -1.04873 | 1.770686 |  | -2.01613 | -0.20795 | 1.989153 |  |
| C      | 0.572181 | -1.35258  | -0.10026 |  | 0.617182 | -1.36054 | -0.11184 |  | 0.425415 | -1.42713 | 0.000248 |  |
| H      | -3.89209 | -0.15179  | -0.78039 |  | -3.85999 | -0.35388 | -0.56292 |  | -3.52356 | -0.45947 | -1.13844 |  |
| H      | -3.60972 | 1.467662  | -0.12206 |  | -3.81859 | 1.178997 | 0.31579  |  | -3.0436  | 1.209485 | -1.55575 |  |
| H      | 3.8294   | 0.737548  | 0.177695 |  | 3.785404 | 0.933728 | 0.18849  |  | 3.901029 | 0.346107 | 0.002062 |  |
| C      | -0.53739 | -2.23827  | -0.31452 |  | -0.39652 | -2.22393 | -0.53409 |  | -0.78451 | -2.13669 | -0.00019 |  |
| H      | -2.85058 | 0.976587  | -1.65736 |  | -3.08167 | 1.052836 | -1.30666 |  | -1.99136 | -0.1345  | -2.01023 |  |
| N      | -1.31519 | -3.07238  | -0.49107 |  | -1.21189 | -2.98546 | -0.88631 |  | -1.80474 | -2.69964 | -0.00031 |  |
